# Supplementary material for: Management of dental care of patients on immunosuppressive drugs for chronic immune-related inflammatory diseases: a survey of French dentists’ practices
Source: Springer Nature journal article supplement (doi:10.1186/s12903-023-03258-7), 2023-08-09
Supplement: MOESM2 [file 25904352]

Supplemental Table 1. Management of medical treatment and oral care of patients on biologics or immunosuppressants.

|                                                                            | All practitioners                  | Specialized dentist activity * | General dentist activity      | <i>p-value</i> | All practitioners                           | Specialized dentist activity* | General dentist activity      | <i>p-value</i> |
|----------------------------------------------------------------------------|------------------------------------|--------------------------------|-------------------------------|----------------|---------------------------------------------|-------------------------------|-------------------------------|----------------|
|                                                                            | <b>In patients under biologics</b> |                                |                               |                | <b>In patients under immunosuppressants</b> |                               |                               |                |
|                                                                            | <b>N = 107 (%)</b>                 | <b>N = 49 (%)</b>              | <b>N = 58 (%)</b>             |                | <b>N = 107 (%)</b>                          | <b>N = 49 (%)</b>             | <b>N = 58 (%)</b>             |                |
| <b>Nature of the expected risks</b>                                        |                                    |                                |                               |                |                                             |                               |                               |                |
| Infectious risk                                                            | 105 (98.13)                        | 49 (100.00)                    | 56 (96.55)                    | 0.18           | 106 (99.07)                                 | 49 (100.00)                   | 57 (98.28)                    | 0.35           |
| Delayed healing                                                            | 98 (91.59)                         | 46 (93.88)                     | 52 (89.66)                    | 0.43           | 90 (84.11)                                  | 40 (81.63)                    | 50 (86.21)                    | 0.51           |
| Hemorrhagic risk                                                           | 20 (18.69)                         | 10 (20.41)                     | 10 (17.24)                    | 0.67           | 13 (12.15)                                  | 5 (10.20)                     | 8 (13.79)                     | 0.57           |
|                                                                            | <b>N = 104 (%)<sup>a</sup></b>     | <b>N = 47 (%)<sup>a</sup></b>  | <b>N = 57 (%)<sup>a</sup></b> |                | <b>N = 103 (%)<sup>b</sup></b>              | <b>N = 47 (%)<sup>b</sup></b> | <b>N = 56 (%)<sup>b</sup></b> |                |
| <b>Blood tests prescribed preoperatively</b>                               |                                    |                                |                               |                |                                             |                               |                               |                |
| No                                                                         | 80 (76.92)                         | 32 (68.09)                     | 48 (84.21)                    |                | 74 (71.84)                                  | 31 (65.96)                    | 43 (76.79)                    |                |
| Yes                                                                        | 24 (23.08)                         | 15 (31.91)                     | 9 (15.79)                     | 0.05           | 29 (28.16)                                  | 16 (34.04)                    | 13 (23.21)                    | 0.22           |
| Blood cell count                                                           | 23 (95.83)                         | 15 (100.00)                    | 8 (88.89)                     | 0.18           | 28 (96.55)                                  | 16 (100.00)                   | 12 (92.31)                    | 0.25           |
| Platelet cell count                                                        | 17 (70.83)                         | 11 (73.33)                     | 6 (66.67)                     | 0.72           | 14 (48.28)                                  | 8 (50.00)                     | 6 (46.15)                     | 0.83           |
| <b>Preoperative management of the medical treatment</b>                    |                                    |                                |                               |                |                                             |                               |                               |                |
| No modification                                                            | 65 (62.50)                         | 29 (61.70)                     | 36 (63.16)                    | 0.87           | 51 (49.51)                                  | 22 (46.81)                    | 29 (51.79)                    | 0.61           |
| Discontinuation ≤ 1 month                                                  | 8 (7.69)                           | 4 (8.51)                       | 4 (7.02)                      | 0.77           | 5 (4.85)                                    | 3 (6.38)                      | 2 (3.57)                      | 0.50           |
| Discontinuation > 1 month                                                  | 4 (3.85)                           | 2 (4.26)                       | 2 (3.51)                      | 0.84           | 1 (0.97)                                    | 1 (2.13)                      | 0 (0.00)                      | 0.27           |
| Duration of discontinuation depending on the type of drug                  | 3 (2.88)                           | 2 (4.26)                       | 1 (1.75)                      | 0.55           | 1 (0.97)                                    | 1 (2.13)                      | 0 (0.00)                      | 0.27           |
| Decision after consultation with the prescribing physicians                | 84 (80.77)                         | 41 (87.23)                     | 43 (75.44)                    | 0.12           | 79 (76.70)                                  | 38 (80.85)                    | 41 (73.21)                    | 0.36           |
| <b>Pre, per, and post- operative dental-care protocol</b>                  |                                    |                                |                               |                |                                             |                               |                               |                |
| <b>Antiseptic mouthwash</b>                                                |                                    |                                |                               |                |                                             |                               |                               |                |
| Preoperative                                                               | 74 (71.15)                         | 33 (70.21)                     | 41 (71.93)                    | 0.84           | 69 (66.99)                                  | 31 (65.96)                    | 38 (67.86)                    | 0.83           |
| Perioperative                                                              | 52 (50.00)                         | 25 (53.19)                     | 27 (47.37)                    | 0.55           | 55 (53.40)                                  | 27 (57.45)                    | 28 (50.00)                    | 0.45           |
| Postoperative                                                              | 79 (75.96)                         | 37 (78.72)                     | 42 (73.68)                    | 0.54           | 74 (71.84)                                  | 32 (68.09)                    | 42 (75.00)                    | 0.43           |
| <b>Antibiotics</b>                                                         |                                    |                                |                               |                |                                             |                               |                               |                |
| Preoperative (single dose, flash)                                          | 49 (47.12)                         | 20 (42.55)                     | 29 (50.88)                    | 0.39           | 45 (43.69)                                  | 20 (42.55)                    | 25 (44.64)                    | 0.83           |
| Preoperative and postoperative (antibiotic coverage until mucosal healing) | 81 (77.88)                         | 39 (82.98)                     | 42 (73.68)                    | 0.25           | 83 (80.58)                                  | 38 (80.85)                    | 45 (80.36)                    | 0.95           |

---

\* Specialized dentist activity: oral surgery, periodontology, endodontics, pediatric dentistry

<sup>a</sup> Only practitioners who responded that they are concerned about the care of patients taking biologics (n = 104) were included in this analysis.

<sup>b</sup> Only practitioners who responded that they were concerned about the care of patients taking immunosuppressants (n = 103) were included in this analysis.
